# Supplementary material for: An investigation of electroosmotic flow and pressure pumped luminol chemiluminescence detection for cobalt analysis in a miniaturised total analytical systemElectronic Supplementary Information available. See http://www.rsc.org/suppdata/lc/b1/b107061d/
Source: Royal Society of Chemistry journal article supplement (doi:10.1039/b107061d), 2001-01-01
Supplement: tables.doc [file tables.doc]

Table S1

Table S2

| **Experiment** | **Mean peak height/mm** | **Rel. S.D (%)** |
| --- | --- | --- |
| **number** | (n=5 for all experiments) |  |
| 1 | 44.5 | 5.66 |
| 2 | 200 | 0 |
| 3 | 55 | 0.73 |
| 4 | 200 | 0 |
| 5 | 33 | 9.06 |
| 6 | 93 | 6.02 |
| 7 | 200 | 0 |
| 8 | 0 | 0 |
| 9 | 0 | 0 |
| 10 | 200 | 0 |
| 11 | 3 | 8.33 |
| 12 | 1 | 0 |
| 13 | 42.75 | 6.08 |
| 14 | 200 | 0 |
| 15 | 0.75 | 19.2 |
| 16 | 8 | 6.25 |
| 17 | 32 | 15.7 |
| 18 | 0.5 | 0 |
| 19 | 22 | 2.64 |
| 20 | 4.5 | 6.42 |
| 21 | 74 | 16.1 |
| 22 | 3 | 16.7 |
| 23 | 4.5 | 6.42 |
| 24 | 46.5 | 16.2 |
| 25 | 0 | 0 |
| 26 | 166 | 4.98 |
| 27 | 24 | 18 |
| 28 | 16 | 6.75 |
| 29 | 109 | 1.21 |
| 30 | 41 | 1.22 |
